# Supplementary material for: Carcinoembryonic antigen and cytokeratin-19 fragments for assessment of therapy response in non-small cell lung cancer: a systematic review and meta-analysis
Source: PubMed Central journal article supplement (PMC5396105; doi:10.1038/bjc.2017.45), 2017-03-09

[CR+PR] versus [SD+PD]  
CEA, pre-treatment level

|                           |             |                    |
|---------------------------|-------------|--------------------|
| Trapé <i>et al</i> , 2003 | 0.67        | (-0.47-1.82)       |
| Wang <i>et al</i> , 2011  | 0.73        | (-0.08-1.53)       |
| Pang <i>et al</i> , 2013  | 0.32        | (-0.17-0.81)       |
| Liu <i>et al</i> , 2014   | -0.07       | (-0.58-0.43)       |
| Wang <i>et al</i> , 2010  | 0.88        | (0.14-1.62)        |
| <b>Summary</b>            | <b>0.40</b> | <b>(0.03-0.76)</b> |

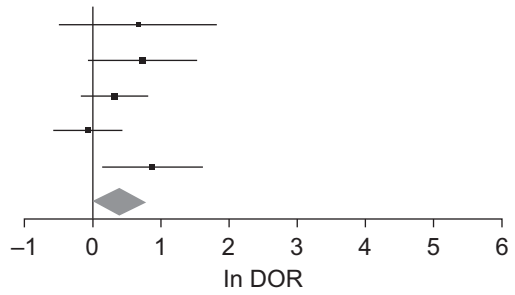

CEA, change

|                               |             |                    |
|-------------------------------|-------------|--------------------|
| Salgia <i>et al</i> , 2001    | 2.50        | (0.74-4.26)        |
| Jin <i>et al</i> , 2010       | 1.39        | (0.42-2.35)        |
| Ardizzoni <i>et al</i> , 2006 | 1.31        | (0.49-2.13)        |
| Yang <i>et al</i> , 2012      | 1.65        | (0.79-2.52)        |
| Arrieta <i>et al</i> , 2013   | 4.41        | (3.32-5.49)        |
| Ishiguro <i>et al</i> , 2010  | 2.32        | (0.38-4.25)        |
| Pang <i>et al</i> , 2013      | 1.72        | (1.14-2.30)        |
| Liu <i>et al</i> , 2014       | 0.96        | (0.45-1.46)        |
| <b>Summary</b>                | <b>1.93</b> | <b>(1.23-2.62)</b> |

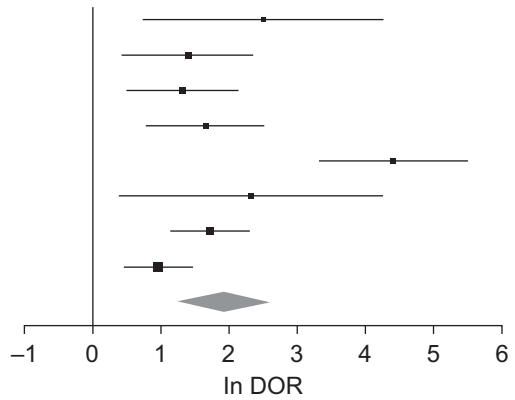

CYFRA 21-1, pre-treatment level

|                           |             |                    |
|---------------------------|-------------|--------------------|
| Trapé <i>et al</i> , 2003 | 0.38        | (-0.83-1.58)       |
| Wang <i>et al</i> , 2011  | 0.86        | (0.03-1.69)        |
| Pang <i>et al</i> , 2013  | 0.63        | (0.10-1.17)        |
| Wang <i>et al</i> , 2010  | 1.14        | (0.39-1.88)        |
| <b>Summary</b>            | <b>0.77</b> | <b>(0.41-1.14)</b> |

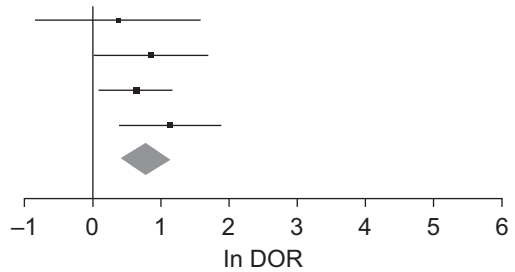

CYFRA 21-1, change

|                               |             |                    |
|-------------------------------|-------------|--------------------|
| Nisman <i>et al</i> , 2008    | 2.60        | (0.43-4.78)        |
| Jin <i>et al</i> , 2010       | 0.93        | (0.02-1.84)        |
| Merle <i>et al</i> , 2004     | 2.46        | (1.02-3.89)        |
| Ardizzoni <i>et al</i> , 2006 | 1.64        | (0.75-2.53)        |
| Yang <i>et al</i> , 2012      | 2.48        | (1.53-3.43)        |
| Wang <i>et al</i> , 2011      | 0.98        | (0.18-1.78)        |
| Pang <i>et al</i> , 2013      | 2.60        | (1.85-3.35)        |
| <b>Summary</b>                | <b>1.86</b> | <b>(1.25-2.47)</b> |

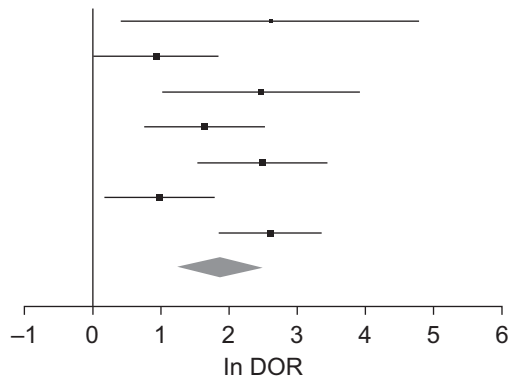

Supplement: bjc201745x5.pdf [file bjc201745x5.pdf]
