# Supplementary material for: Carcinoembryonic antigen and cytokeratin-19 fragments for assessment of therapy response in non-small cell lung cancer: a systematic review and meta-analysis
Source: PubMed Central journal article supplement (PMC5396105; doi:10.1038/bjc.2017.45), 2017-03-09

[CR+PR] versus [SD+PD]

CEA

change (5 studies, AUC 0.83,  $P=0.038$ )

CYFRA 21-1

change (5 studies, AUC 0.72,  $P=0.847$ )

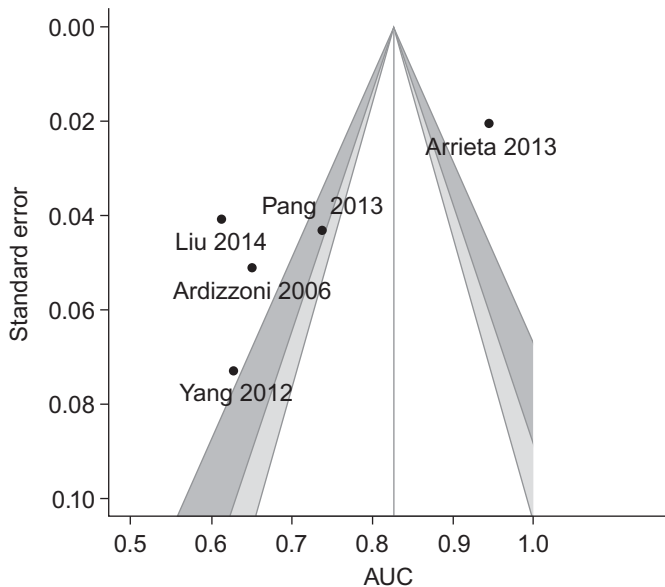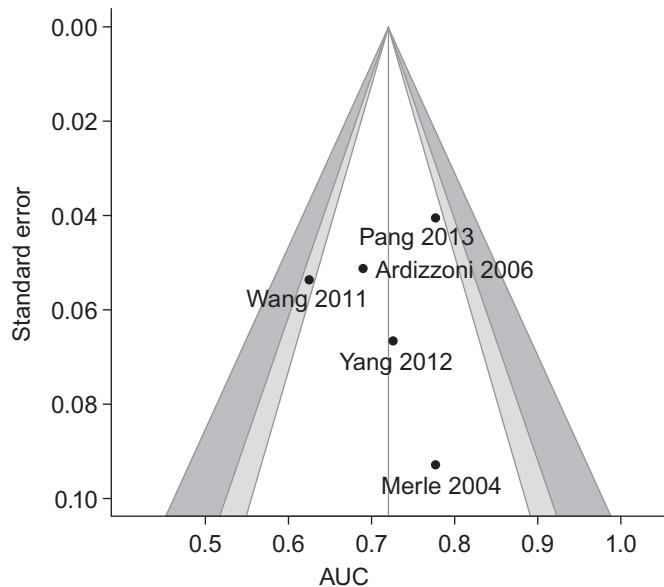

Supplement: bjc201745x2.pdf [file bjc201745x2.pdf]
