# Supplementary material for: Carcinoembryonic antigen and cytokeratin-19 fragments for assessment of therapy response in non-small cell lung cancer: a systematic review and meta-analysis
Source: PubMed Central journal article supplement (PMC5396105; doi:10.1038/bjc.2017.45), 2017-03-09

[CR+PR] versus [SD+PD]

CEA

pre-treatment level (5 studies, DOR 1.42,  $P=0.178$ )

CYFRA 21-1

pre-treatment level (4 studies, DOR 2.16,  $P=0.975$ )

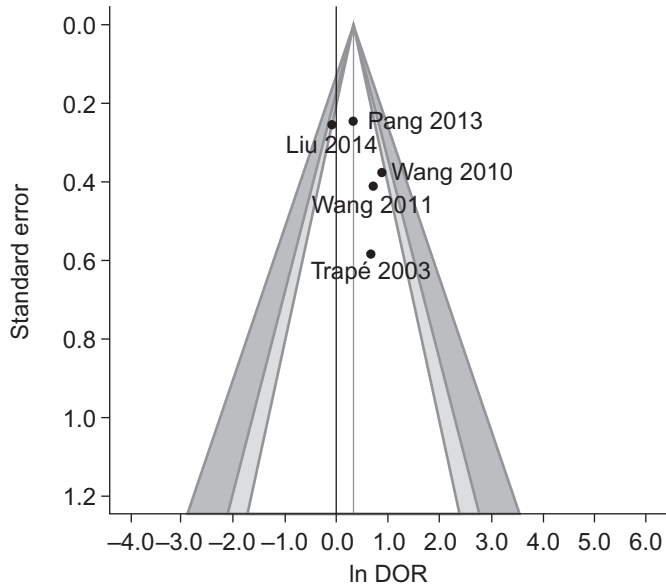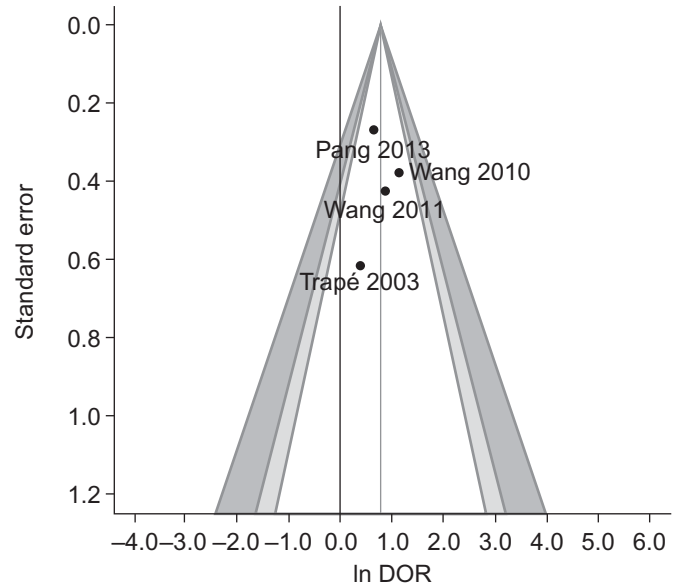

change (8 studies, DOR 5.00,  $P=0.153$ )

change (7 studies, DOR 6.11,  $P=0.613$ )

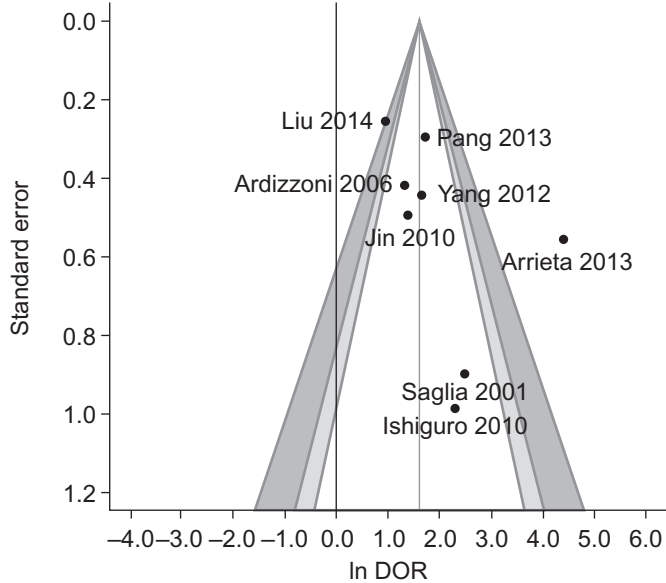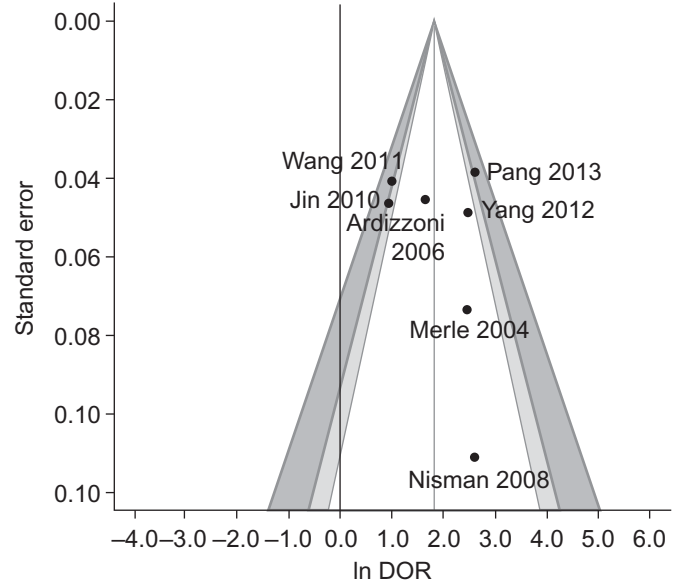

Supplement: bjc201745x3.pdf [file bjc201745x3.pdf]
