# Supplementary material for: Carcinoembryonic antigen and cytokeratin-19 fragments for assessment of therapy response in non-small cell lung cancer: a systematic review and meta-analysis
Source: PubMed Central journal article supplement (PMC5396105; doi:10.1038/bjc.2017.45), 2017-03-09

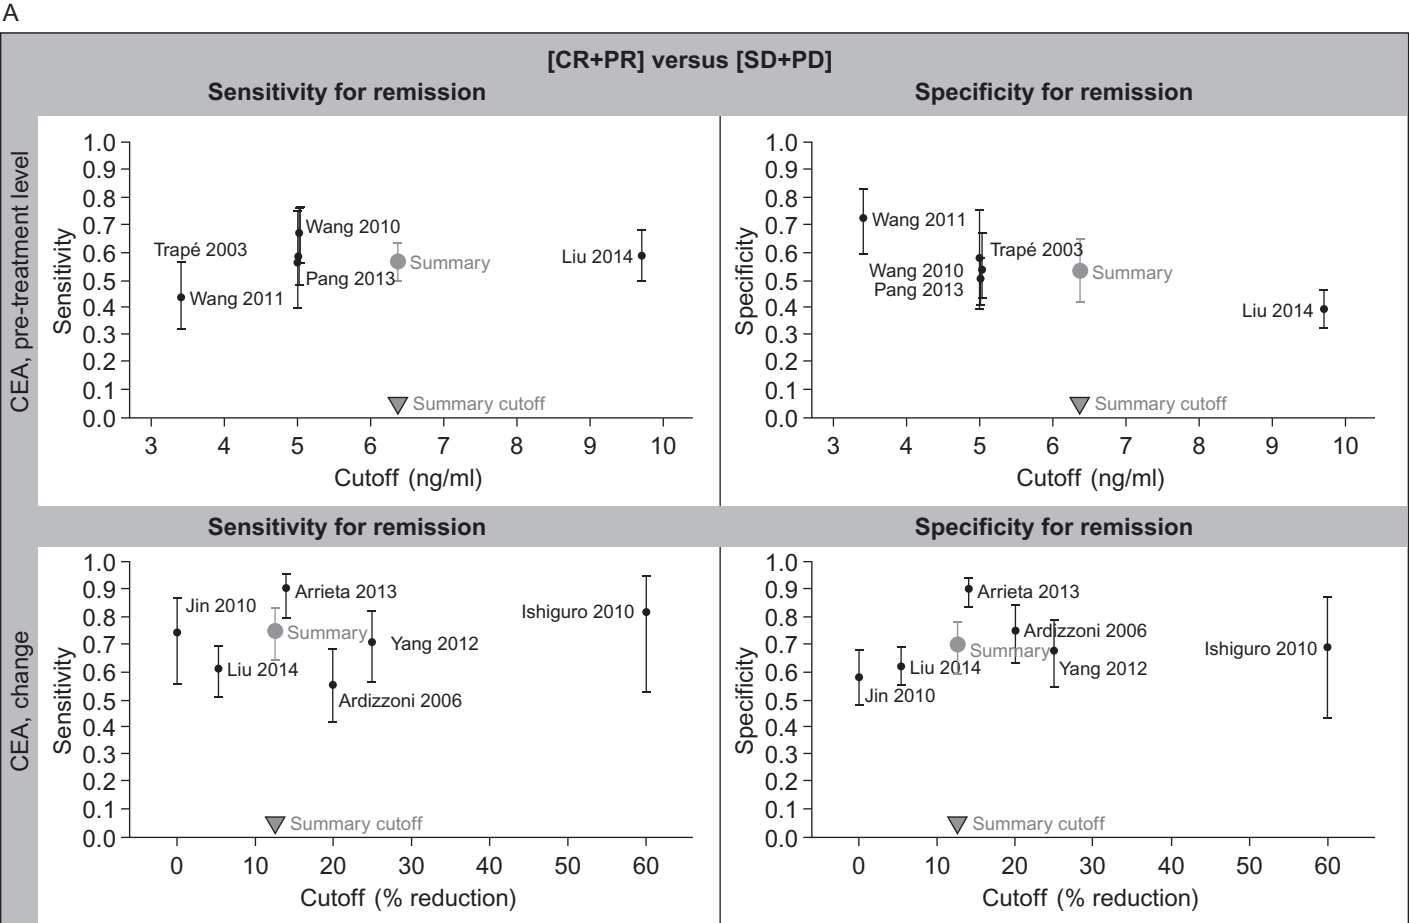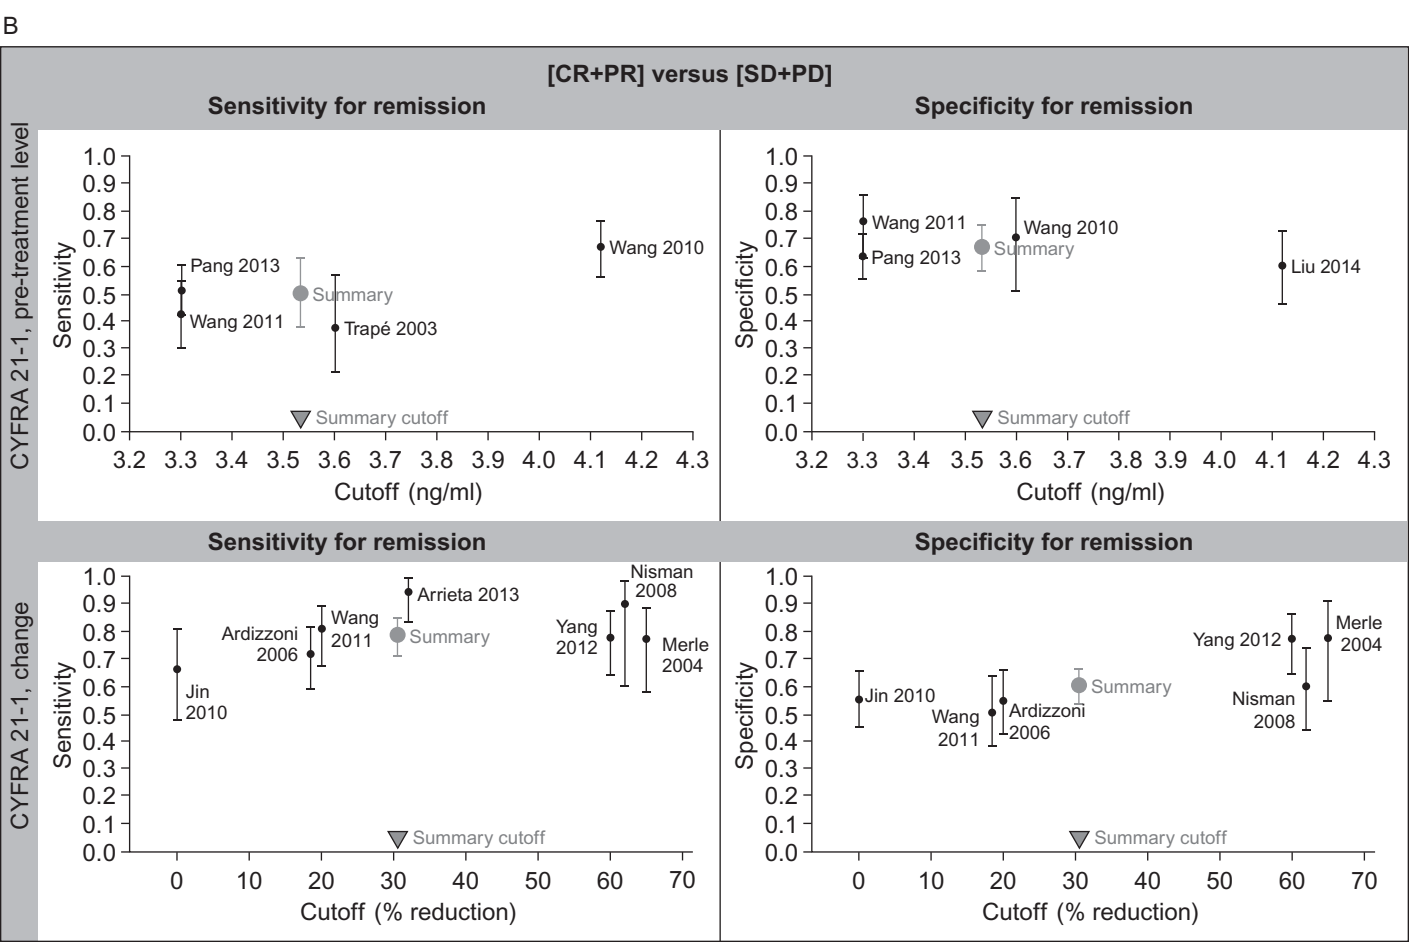

Supplement: bjc201745x4.pdf [file bjc201745x4.pdf]
